# Supplementary material for: Adsorption of phosphate onto amine functionalized nano-sized magnetic polymer adsorbents: mechanism and magnetic effects
Source: Royal Society of Chemistry journal article supplement (doi:10.1039/c4ra14630a), 2015-01-01
Supplement: c4ra14630a1.pdf [file c4ra14630a1.pdf]

## Supplementary Information (SI)

### **Adsorption of phosphate onto amine functionalized nano-sized magnetic polymer adsorbents: Mechanism and magnetic effect**

Haoyu Shen<sup>a\*</sup>, Zhejun Wang<sup>a</sup>, Ameng Zhou<sup>a</sup>, Junliang Chen<sup>a</sup>, Meiqin Hu<sup>a</sup>, Xinyan Dong<sup>a</sup>,  
Qinghua Xia<sup>b</sup>

<sup>a</sup> Ningbo Institute of Technology, Zhejiang University; Ningbo, 315100, China;

<sup>b</sup> Ministry-of-Education Key Laboratory for the Synthesis and Applications of Organic Functional Molecules, Hubei Collaborative Innovation Center for Advanced Organochemical Materials, Hubei University, Wuhan 430062, China

#### **Figure Captions of Fig. S1~S4**

**Fig. S1** The preparation procedure of TEPA-Fe<sub>3</sub>O<sub>4</sub>-NMPs

**Fig. S2** SEM (a) and TEM (b) of TEPA-Fe<sub>3</sub>O<sub>4</sub>-NMPs-1

**Fig. S3** The species of phosphate (obtained by running Visual MINTEQ 3.0 based on the experimental data of total phosphate) (a) TEPA-Fe<sub>3</sub>O<sub>4</sub>-NMPs-0; (b) TEPA-Fe<sub>3</sub>O<sub>4</sub>-NMPs-0.5; (c) TEPA-Fe<sub>3</sub>O<sub>4</sub>-NMPs-1; (d) TEPA-Fe<sub>3</sub>O<sub>4</sub>-NMPs-1.5; (e) TEPA-Fe<sub>3</sub>O<sub>4</sub>-NMPs-2

**Fig.S4** The zeta potential of TEPA-Fe<sub>3</sub>O<sub>4</sub>-NMPs as a function of pH

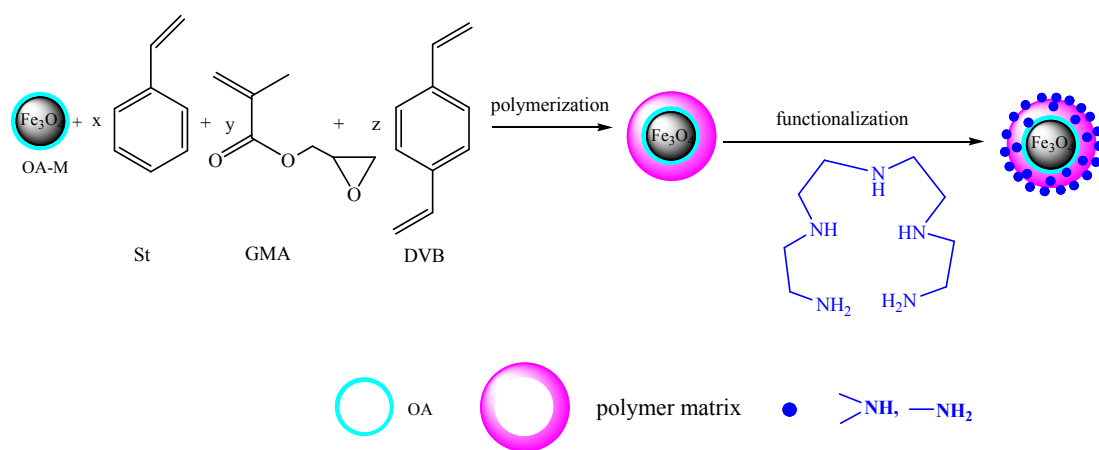

**Fig. S1** The preparation procedure of TEPA- $\text{Fe}_3\text{O}_4$ -NMPs

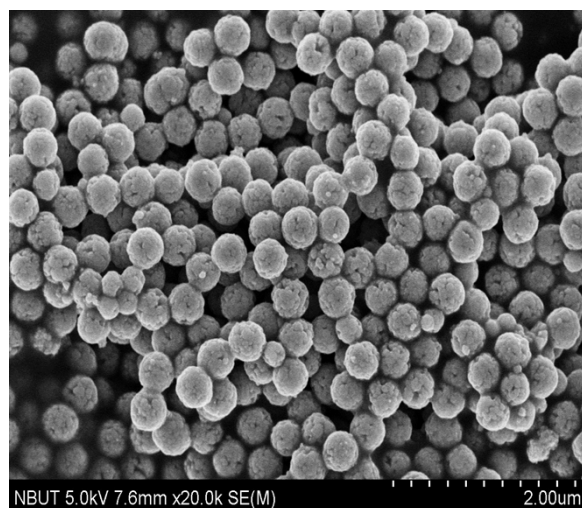

(a)

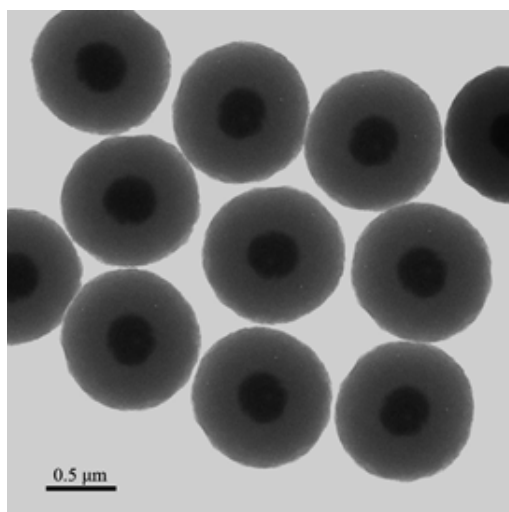

(b)

**Fig. S2** SEM (a) and TEM (b) of TEPA- $\text{Fe}_3\text{O}_4$ -NMPs-1

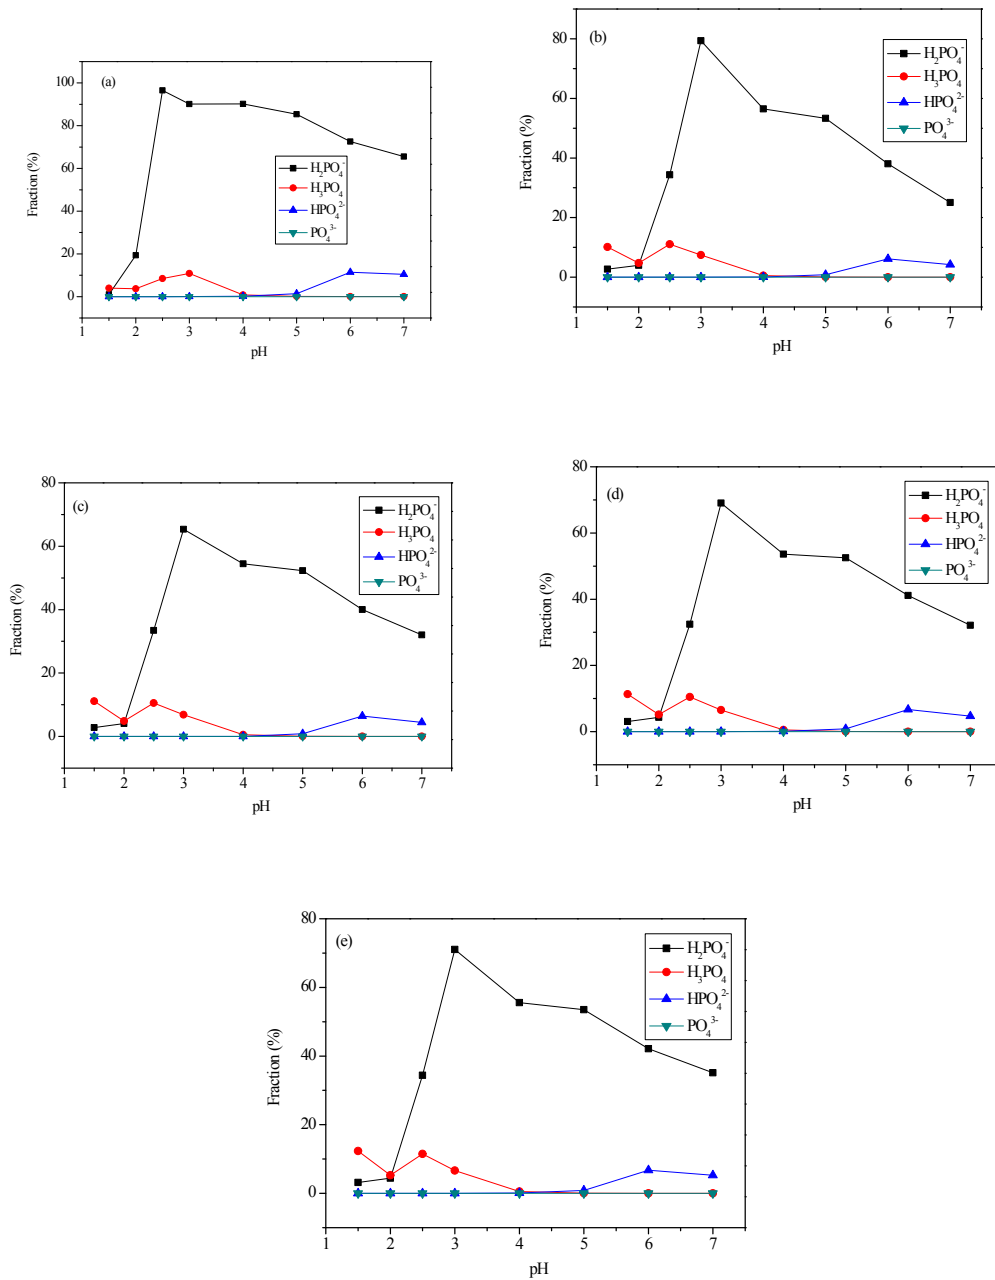

**Fig. S3** The species of phosphate (obtained by running Visual MINTEQ 3.0 based on the experimental data of total phosphate)

(a) TEPA-Fe<sub>3</sub>O<sub>4</sub>-NMPs-0; (b) TEPA-Fe<sub>3</sub>O<sub>4</sub>-NMPs-0.5; (c) TEPA-Fe<sub>3</sub>O<sub>4</sub>-NMPs-1; (d) TEPA-Fe<sub>3</sub>O<sub>4</sub>-NMPs-1.5; (e) TEPA-Fe<sub>3</sub>O<sub>4</sub>-NMPs-2

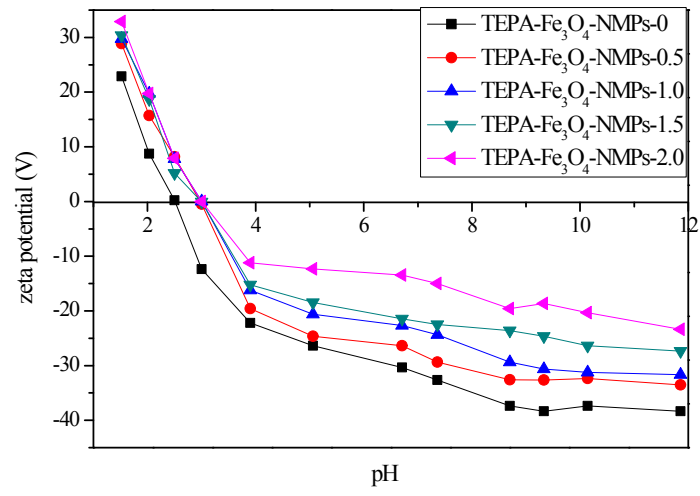

Fig.S4 The zeta potential of TEPA-Fe<sub>3</sub>O<sub>4</sub>-NMPs as a function of pH
